# Supplementary material
Source: PubMed Central journal article supplement (PMC1196134)
Supplement: jbacter_187_17_6084__1.pdf [file jbacter_187_17_6084__1.pdf]

Figure 1S. Alignment of *T. pallidum* Nichols and Sea 81-4 strain *tprJ-tprI* (A) and *tprG-tprF* (B) loci. Identical residues are indicated by black shading and non-synonymous changes are indicated in a gray or no shading, respectively. Predicted start codons (according to Fraser et al, 1998) are indicated by asterisks for each *tpr* gene along with stop codons in the Nichols strain sequences. The Sea 81-4 *tprJ* locus contains a *tprG*-like ORF whose central nonconserved region shows sequence identity with the corresponding Nichols and Sea 81-4 strain *tprG* sequence. Frameshift and premature stop codon positions in Sea 81-4 *tprG*, are indicated by asterisks. -35 and -10 predicted Sigma 70 consensus sequences are underlined. Due to its premature termination, the Sea 81-4 *tprG* intergenic spacer is 422 bp long instead of 58 bp as in Nichols.

Figure 2S. Alignment of TprI homologs in *T. pallidum* Nichols and Sea 81-4 Strain.

Figure 3S. Alignment of TprG homologs in *T. pallidum* Nichols and Sea 81-4 Strain showing a shorter TprG ORF in Sea 81-4. Frameshift position is indicated by an asterisk.

Figure 4S. Alignment of TprF homologs in *T. pallidum* Nichols and Sea 81-4 Strain.



|          |                    |      |                                                               |
|----------|--------------------|------|---------------------------------------------------------------|
| Sea 81-4 | <i>tprJ/I</i> loci | 780  | CCACACGCGCCGTGGGCAGCACCCGGCACTGTATGCGGAGCTGAAGGTGGCGGACCTGCA  |
| Nichols  | <i>tprJ/I</i> loci | 781  | CCACACGCGCCGTGGGCAGCACCCGGCACTGTATGCGGAGCTGAAGGTGGCGGACCTGCA  |
| Sea 81-4 | <i>tprJ/I</i> loci | 840  | GGCGGACCTGAGTCAGGGGAAGGCAGGTTTTGCCATTAAGCGCAAGGGGAAGGTAGAGGC  |
| Nichols  | <i>tprJ/I</i> loci | 841  | GGCGGACCTGAGTCAGGGGAAGGCAGGTTTTGCCATTAAGCGCAAGGGGAAGGTAGAGGC  |
| Sea 81-4 | <i>tprJ/I</i> loci | 900  | GACACTACACTGTTATGGGGCTACCTGACGATTGGGAAGAACCCACGTTTCTGACGAA    |
| Nichols  | <i>tprJ/I</i> loci | 901  | GACACTACACTGTTATGGGGCTACCTGACGATTGGGAAGAACCCACGTTTCTGACGAA    |
| Sea 81-4 | <i>tprJ/I</i> loci | 960  | CTTTGCCCGGCTGTGGAAGCCGTGGGTGACAGCGCAGTACCAGGAGGATGCGGTACAGTA  |
| Nichols  | <i>tprJ/I</i> loci | 961  | CTTTGCCCGGCTGTGGAAGCCGTGGGTGACAGCGCAGTACCAGGAGGATGCGGTACAGTA  |
| Sea 81-4 | <i>tprJ/I</i> loci | 1020 | TGCGCCGGGTTTGGGGTTTAGGCGGCAAGGTTGGGTATCGGGCACAGGACATTGGGGG    |
| Nichols  | <i>tprJ/I</i> loci | 1021 | TGCGCCGGGTTTGGGGTTTAGGCGGCAAGGTTGGGTATCGGGCACAGGACATTGGGGG    |
| Sea 81-4 | <i>tprJ/I</i> loci | 1080 | CAGTGGGGTCAGCCTTGATGTGGGGTTTTCTCCTTTGCCTCTAACGGTGCCTGGGATAG   |
| Nichols  | <i>tprJ/I</i> loci | 1081 | CAGTGGGGTCAGCCTTGATGTGGGGTTTTCTCCTTTGCCTCTAACGGTGCCTGGGATAG   |
| Sea 81-4 | <i>tprJ/I</i> loci | 1140 | TACTGACCCACGCACAGTAAGTATGGCTTTGGGGCAGACTTGAAGCTAATGTATGCGCG   |
| Nichols  | <i>tprJ/I</i> loci | 1141 | TACTGACCCACGCACAGTAAGTATGGCTTTGGGGCAGACTTGAAGCTAATGTATGCGCG   |
| Sea 81-4 | <i>tprJ/I</i> loci | 1200 | TGCAGGACACCCTCTGTGCACGGTAGAGCTTGCCAGCAATGTTACGCTAGAAGACGGATA  |
| Nichols  | <i>tprJ/I</i> loci | 1201 | TGCAGGACACCCTCTGTGCACGGTAGAGCTTGCCAGCAATGTTACGCTAGAAGACGGATA  |
| Sea 81-4 | <i>tprJ/I</i> loci | 1260 | CCTCATCGGTGCACAGAAGGACGCAAAACAATCAGAACAAGGATAAACTGCTGTGGAATGT |
| Nichols  | <i>tprJ/I</i> loci | 1261 | CCTCATCGGTGCACAGAAGGACGCAAAACAATCAGAACAAGGATAAACTGCTGTGGAATGT |
| Sea 81-4 | <i>tprJ/I</i> loci | 1320 | AGGGGGCCGACTCACCTCGAACCAGGCGCGGCTTCCGCTTCTCCTTCGCCCTCGACGC    |
| Nichols  | <i>tprJ/I</i> loci | 1321 | AGGGGGCCGACTCACCTCGAACCAGGCGCGGCTTCCGCTTCTCCTTCGCCCTCGACGC    |
| Sea 81-4 | <i>tprJ/I</i> loci | 1380 | CGGTAACCAACACCAGAGTGCACAGGACTTTCAAAATCGCACACAGAGGGCGCAGAGTGA  |
| Nichols  | <i>tprJ/I</i> loci | 1381 | CGGTAACCAACACCAGAGTGCACAGGACTTTCAAAATCGCACACAGAGGGCGCAGAGTGA  |
| Sea 81-4 | <i>tprJ/I</i> loci | 1440 | ACTCACCGCCTCTCAAATAACCTCTTCCAGGGAGAAAGTCAAAAACAGGAAGCCTGGCT   |
| Nichols  | <i>tprJ/I</i> loci | 1441 | ACTCACCGCCTCTCAAATAACCTCTTCCAGGGAGAAAGTCAAAAACAGGAAGCCTGGCT   |
| Sea 81-4 | <i>tprJ/I</i> loci | 1500 | GGAC--GAATAATGCAA-AGAAAGGTGCTTGATGCCGTAACGGCAGCCAC-CGAAACCGCC |
| Nichols  | <i>tprJ/I</i> loci | 1501 | AACCCAGGTAGTGCAACAGCCGACGC---AGACAGTAACGGCTGGAGTTCGAAGC-GCGC  |
| Sea 81-4 | <i>tprJ/I</i> loci | 1556 | TTCAGTCGAGGGGAAACCGGTACATAA-CG-----GCAGTGTCAAACGTAAAAGTC-     |
| Nichols  | <i>tprJ/I</i> loci | 1557 | TGGAAATCTCGGGGACTACGTACATAAACCGGTAGAGGCAGT-TCAACCTAATCCTGCT   |
| Sea 81-4 | <i>tprJ/I</i> loci | 1606 | -ACCCCTCCGGTA--GCTGC-CACGCTTTTGACGAACCTGAAGGTGTTTCATTACCGACCC |
| Nichols  | <i>tprJ/I</i> loci | 1616 | AAACCTACCGGTAAGGTTGTGCAAAATCTTACACCCCGCAGGGAAGTC--CGCCGAACC   |
| Sea 81-4 | <i>tprJ/I</i> loci | 1662 | TCCCTACACCGTCAACCGCTTCCCGCGCTTCTGCATTTTCCCTGATGGGGCAGGTTTTGCT |
| Nichols  | <i>tprJ/I</i> loci | 1674 | TGC-----CGCCGCTTCCCTGCACTTCTGCATTTTCCCTGATGGGGCAGGTTTTGCT     |

```

-----
Sea 81-4 tprJ/I loci 1722 GCAGTACGATGCGGAGCAGGTGGTGAAGGGGTTGAGCAGGTACAGACGCAAATCGTTGC
Nichols tprJ/I loci 1726 GCAGTACGATGCGGAGCAGGTGGTGAAGGGGTTGAGCAGGTACAGACGCAAATCGTCA
-----
----- tprJ central unique region -----
Sea 81-4 tprJ/I loci 1782 TGAAATTAACAGAAAGTGAAGCGGCTGTGGCTCAGAGCAAGGCTGCAGCACAGGCATT
Nichols tprJ/I loci 1786 TGAAATTAATCAGAAAGTGAAGCGGCTGTGGCAAAAAATAATGCAA----ACATGCAAG
-----
Sea 81-4 tprJ/I loci 1842 CA--TCAACGGTCTTACCAAGGCAATA----GAAGACG--TGGCTGATGCGTTGCTT--GC
Nichols tprJ/I loci 1842 CGGTGCGGGGTAGT--CTAGCGGATACTGCGAGAATGGTAGGC-GAAGCGCTCATTAGC
-----
Sea 81-4 tprJ/I loci 1893 A-CCGCATAAGCGGAAATCCGATGAGCCTCTTCA-ACCTTCCGGATCAA-CAAAAATTACT
Nichols tprJ/I loci 1899 AGCAACTATCACGTAAGCAGAACAGCA--TTCTGACCAATGGTGAGCGTGCAAGATGACGT
-----
Sea 81-4 tprJ/I loci 1950 GAAGGACGATCTCGCTGATCTTATTCCAAAGCTTACGG-CTGAGGCTACAAAGTTTTTCA
Nichols tprJ/I loci 1957 GAAACAGGATCTGGCAGATTTAGTGCCGATG-ATGCGAACGGAAATAACGGCGTTTTTTC
-----
Sea 81-4 tprJ/I loci 2009 CTGAGGGTCAGACGTTT-CTAACCGAAGAAGTGAAGAAGAAGACGGATGCGTTGAATGCG
Nichols tprJ/I loci 2016 C-GAGTGTCCAGCAACACAATAACCGAAGAAGTGAAGAAGAAGACGGATGCGTTGAATGCG
-----
Sea 81-4 tprJ/I loci 2068 GGGCAGCAGATACGTCAGGCTATACAGAACCTGCGTGCGTCTGCATGGCGTGCCTTTCTA
Nichols tprJ/I loci 2075 GGGCAGCAGATACGTCAGGCTATACAGAACCTGCGTGCGTCTGCATGGCGTGCCTTTCTA
-----
Sea 81-4 tprJ/I loci 2128 ATGGGAGTCAGCGCCGTGTGCTGTATCTTGACACCTACAATGTCGCCCTTCGATGCACTG
Nichols tprJ/I loci 2135 ATGGGAGTCAGCGCCGTGTGCTGTATCTTGACACCTACAATGTCGCCCTTCGATGCGCTG
-----
Sea 81-4 tprJ/I loci 2188 CTTACAGCGCAGTGGAAAGTGGCTGTCTTCTGGCATATACGTTGCCACAGCACCGGCAAAAC
Nichols tprJ/I loci 2195 TTTACGGCGCAGTGGAAAGTGGCTGTCTTCTGGCATATACTTTGCCACAGCACCGGCAAAAC
-----
Sea 81-4 tprJ/I loci 2248 GTTTTTGGCACCAGGGTGTAGATAACACCATCGCAAGCTGTGGCGACTTTGCCGGATTG
Nichols tprJ/I loci 2255 GTTTTTGGCACCAGGGTGTAGATAACACCATCGCAAGCTGTGGCGACTTTGCCGGATTG
-----
Sea 81-4 tprJ/I loci 2308 CTCAAACCTCGAAACTAAGAGCGGTGACCCCTACACCCACCTGCTCACCGGCTGGACGCC
Nichols tprJ/I loci 2315 CTTAAGCTCGAAACTAAGAGCGGTGACCCCTACACCCACCTGCTCACCGGCTGGACGCC
-----
Sea 81-4 tprJ/I loci 2368 GCGTGTGAAACACGCGTGTACATCCCCCTCACCCATGACCTGTACAAAAATAATAACGGG
Nichols tprJ/I loci 2375 GCGTGTGAAACACGCGTGTACATCCCCCTCACCCATGACCTGTACAAAAATAATAACGGG
-----
Sea 81-4 tprJ/I loci 2428 AACCCCTCTCCCTTCCGGCGGTTCCCTCAGGGCACATTGGCTGCCGGTGGTGGGAAAGGCG
Nichols tprJ/I loci 2435 AACCCCTCTCCCTTCCGGCGGTTCCCTCAGGGCACATTGGCTGCCGGTGGTGGGAAAGGCG
-----
Sea 81-4 tprJ/I loci 2488 TGGTGTAGCTATCGCATCCCGGTGCAGGATTATGGCTGGGTGAAGCCAAGCGTTACGGTC
Nichols tprJ/I loci 2495 TGGTGTAGCTATCGCATCCCGGTGCAGGATTACGGCTGGGTGAAGCCAAGCGTTACGGTC
-----
Sea 81-4 tprJ/I loci 2548 CATGCCTCTACCAACCGTGACACCTGAATGCCCTGCTGCAGGTGGAGCAGTAGGAGCT
Nichols tprJ/I loci 2555 CATGCCTCTACCAACCGTGACACCTGAATGCCCTGCTGCAGGTGGAGCAGTAGGAGCT

```

Sea 81-4 *tprJ/I* loci 2608 ACCTATCTAACCAAGGAGTACTGTGCACAGCTGCGTGTGGTATTTTCAGCCAGTCTCATA  
Nichols *tprJ/I* loci 2615 ACCTATCTAACCAAGGAGTACTGTGCACAGCTGCGTGTGGTATTTTCAGCCAGTCTCATA

Sea 81-4 *tprJ/I* loci 2668 GAGAAGACGGTATTCTCCCTTGATTGGGAACAGGGTATGCTCTCTGATGTCCCGTACCTG  
Nichols *tprJ/I* loci 2675 GAGAAGACGGTATTCTCCCTTGATTGGGAACAGGGTATGCTCTCTGATGTCCCGTACCTG

Sea 81-4 *tprJ/I* loci 2728 CTGGTGTCCGAGTGCCTCACCCAGGGAATCGGCCGCATCGTGTGCGGGCCTACCCTCTCC  
Nichols *tprJ/I* loci 2735 CTGGTGTCCGAGTGCCTCACCCAGGGAATCGGCCGCATCGTGTGCGGGCCTACCCTCTCC

*tprJ* stop (genome sequence)

\*\*\*

Sea 81-4 *tprJ/I* loci 2788 TGGTAGTCACACGCGGCTAGACGGGTGGGGGGGGTGGAGGTAGAAGTGAGAGGAGGGGA  
Nichols *tprJ/I* loci 2795 TGGTAGTCACACGCGGCTAGACGGGTGGGGGGGG-TGAGGTAGAAGTGAGAGGAGGGGA

*tprI* start (genome sequence)

\*\*\*

Sea 81-4 *tprJ/I* loci 2848 GTGAGTGGGCAGGCAGGTGATGCAAGCGGGGTACTTGCGGGCATGGTATGTGCTGCTTC  
Nichols *tprJ/I* loci 2854 GTGAGTGGGCAGGCAGGTGATGCAAGCGGGGTACTTGCGGGCATGGTATGTGCTGCTTC

Sea 81-4 *tprJ/I* loci 2908 TGGTTATGCAGGCGTACTCACTCCGCAGGTCAGTGGCACAGCCAGCTCCAGTGGGGCAT  
Nichols *tprJ/I* loci 2914 TGGTTATGCAGGCGTACTCACTCCGCAGGTCAGTGGCACAGCCAGCTCCAGTGGGGCAT

Sea 81-4 *tprJ/I* loci 2968 TCGGTTCCAGAAGAATCCACGCACTGGCCCGGGCAAGCACACCCATGGGTTTCGCACCTAC  
Nichols *tprJ/I* loci 2974 TCGGTTCCAGAAGAATCCACGCACTGGCCCGGGCAAGCACACCCATGGGTTTCGCACCTAC

Sea 81-4 *tprJ/I* loci 3028 CAATGGTCTGACTATTTCCCTGCCGTTGGTGTCAAAGCACACCCACACCCGCCGAGGGGA  
Nichols *tprJ/I* loci 3034 CAATAGTCTGACTATTTCCCTGCCGTTGGTGTCAAAGCACACCCACACCCGCCGAGGGGA

Sea 81-4 *tprJ/I* loci 3088 GGCACGCTCAGGGGTGTGGGCACAGCTGCAGCTGAAGGACCTGGCAGTAGAGCTTGCCTC  
Nichols *tprJ/I* loci 3094 GGCACGCTCAGGGGTGTGGGCACAGCTGCAGCTGAAGGACCTGGCAGTAGAGCTTGCCTC

Sea 81-4 *tprJ/I* loci 3148 TTCTAAAAGCTCAACGGCCCTGTCCTTTACCAAACCTTACCCTTCCTTCCAGGCAACCCT  
Nichols *tprJ/I* loci 3154 TTCTAAAAGCTCAACGGCCCTGTCCTTTACCAAACYTACCCTTCCTTCCAGGCAACCCT

Sea 81-4 *tprJ/I* loci 3208 GCACTGTTATGGGGCCTACCTGACAGTGGGTACCAGTCCCTTCCCTGTGTGGTTAACTTTGC  
Nichols *tprJ/I* loci 3214 GCACTGTTATGGGGCCTACCTGACAGTGGGTACCAGTCCCTTCCCTGTGTGGTTAACTTTGC

Sea 81-4 *tprJ/I* loci 3268 CCAGCTGTGAAACCCTTTGTCACCCGTGCTATTTCAGAAAAGGACACTCGCTATGCCCC  
Nichols *tprJ/I* loci 3274 CCAGCTGTGAAACCCTTTGTCACCCGTGCTATTTCAGAAAAGGACACTCGCTATGCCCC

Sea 81-4 *tprJ/I* loci 3328 TGGTTTCTCCGGCTCCGGGGCAAAACTCGGCTACCAGGCCACAATGTGGGAAACAGCGG  
Nichols *tprJ/I* loci 3334 TGGTTTCTCCGGYTCCGGGGCAAAACTCGGCTACCAGGCCACAATGTGGGAAACAGCGG

Sea 81-4 *tprJ/I* loci 3388 AGTAGATGTGGACATCGGTTTCCCTCTCCTTCCCTTTCCAATGGTGCCTGGGATAGTACTGA  
Nichols *tprJ/I* loci 3394 AGTAGATGTGGACATCGGTTTCCCTCTCCTTCCCTTTCCAATGGTGCCTGGGATAGTACTGA

Sea 81-4 *tprJ/I* loci 3448 CACCACGCACAGCAAGTATGGCTTCGGGGACCGATGCAACGCTTTCCTATGGCGTCGACCG  
Nichols *tprJ/I* loci 3454 CACCACGCACAGCAAGTATGGCTTCGGGGCCCGATGCAACGCTTTCCTATGGCGTCGACCG

|          |               |      |      |                                                               |
|----------|---------------|------|------|---------------------------------------------------------------|
| Sea 81-4 | <i>tprJ/I</i> | loci | 3508 | TCAGCGGCTGCTTACGTTGGAGCTGGCAGGGAATGCCACACTGGACCAGAACTACGTAA   |
| Nichols  | <i>tprJ/I</i> | loci | 3514 | TCAGCGGCTGCTTACGTTGGAGCTGGCAGGGAATGCCACACTGGAGCAGCACTACCGTAA  |
| Sea 81-4 | <i>tprJ/I</i> | loci | 3568 | GGGTACCGAAGACTCCAAAGAACGAAAACAAAACAGCACTCCTGTGGGGAGTAGGAGGCCG |
| Nichols  | <i>tprJ/I</i> | loci | 3574 | GGGTACCGAAGACTCCACGAACGAAAACAAAACAGCACTCCTGTGGGGAGTAGGAGGCCG  |
| Sea 81-4 | <i>tprJ/I</i> | loci | 3628 | ACTCACCTCGAACCAGGCGCCGGCTTCCGCTTCTCCTTCGCCCTCGACGCCGGTAACCA   |
| Nichols  | <i>tprJ/I</i> | loci | 3634 | ACTCACCTCGAACCAGGCGCCGGCTTCCGCTTCTCCTTCGCCCTCGACGCCGGTAACCA   |
| Sea 81-4 | <i>tprJ/I</i> | loci | 3688 | ACGCCAGGACCCTGCCGATGCAGGTAATCGCCTTCTGGCAACGGGGAGCTCACGGGAGAA  |
| Nichols  | <i>tprJ/I</i> | loci | 3694 | ACACCAGGACCCTGCCGATGCAGGTAATCGCCTTCTGGCAACGGGGAGCTCACGGGAGAA  |
| Sea 81-4 | <i>tprJ/I</i> | loci | 3748 | GTTTCACAGCGGTTTCGATGCCCTCAGGGTGGAGCAATACCGTGTAAGGATAAGTATCT   |
| Nichols  | <i>tprJ/I</i> | loci | 3754 | GTTTGACAGCGGTTTCGATGCCCTCAGGGTGGAGCAATACCGTGTAAGGATAAGTATCT   |
| Sea 81-4 | <i>tprJ/I</i> | loci | 3808 | TGAATTTTTGCTGGGACAGATGGCGGAGTCTCGATTCTCGAGCGGGTGGGGCTTGCCCT   |
| Nichols  | <i>tprJ/I</i> | loci | 3814 | TGAATTTTTGCTGGGACAGATGGCGGAGTCTCGATTCTCGAGCGGGTGGGGCTTGCCCT   |
| Sea 81-4 | <i>tprJ/I</i> | loci | 3868 | CACGCTGCAGGACGGTACGCTCGTCTCTACGCTGACGAAGGTTGCCACTGATAGTGGAGA  |
| Nichols  | <i>tprJ/I</i> | loci | 3874 | CACGCTGCAGGACGGTACGCTCGTCTCTACGCTGACGAAGGTTGCCACTGATAGTGGAGA  |
| Sea 81-4 | <i>tprJ/I</i> | loci | 3928 | TCGGTTTTATCAAATGGCGTTGGTAAAACCTTGCCCCAGAGGGCGCAGGCGGAGCAGAG   |
| Nichols  | <i>tprJ/I</i> | loci | 3934 | TCGGTTTTATCAAATGGCGTTGGTAAAACCTTGCCCCAGAGGGCGCAGGCGGAGCAGAG   |
| Sea 81-4 | <i>tprJ/I</i> | loci | 3988 | ACTACAGGAGATTGTGGCGCCGAGTCAGTCGGACATCGTGCTTATCATGCTGCTAACCTG  |
| Nichols  | <i>tprJ/I</i> | loci | 3994 | ACTACAGGAGATTGTGGCGCCGAGTCAGTCGGACATCGTGCTTATCATGCTGCTAACCTG  |
| Sea 81-4 | <i>tprJ/I</i> | loci | 4048 | GCTTGAGCGTGCACGGCTGGACCGGTTCAATGCTGATGCGCTGCTTACGGCGCAGTGGAC  |
| Nichols  | <i>tprJ/I</i> | loci | 4054 | GCTTGAGCGTGCACGGCTGGACCGGTTCAATGCTGATGCGCTGCTTACGGCGCAGTGGAC  |
| Sea 81-4 | <i>tprJ/I</i> | loci | 4108 | CTATGTGTCGGCTGGACTGTATGGGGCGACGGCGGGTACCAATGTATTTGGTAAGCGCGT  |
| Nichols  | <i>tprJ/I</i> | loci | 4114 | CTATGTGTCGGCTGGACTGTATGGGGCGACGGCGGGTACCAATGTATTTGGTAAGCGCGT  |
| Sea 81-4 | <i>tprJ/I</i> | loci | 4168 | GCTGCCTGCGCTGCGGTCTGGCATTGATTTTGCCGGATTCTCAAACCTCGAAACCAA     |
| Nichols  | <i>tprJ/I</i> | loci | 4174 | GCTGCCTGCGCTGCGGTCTGGCATTGATTTTGCCGGATTCTCAAACCTCGAAACCAA     |
| Sea 81-4 | <i>tprJ/I</i> | loci | 4228 | AAGCGGTGACCCCTACACCCACCTGCTCACCGGCCTGAACGCCGGCGTGAAGCACGCGT   |
| Nichols  | <i>tprJ/I</i> | loci | 4234 | AAGCGGTGACCCCTACACCCACCTGCTCACCGGCCTGAACGCCGGCGTGAAGCACGCGT   |
| Sea 81-4 | <i>tprJ/I</i> | loci | 4288 | GTACATCCCCCTCACCTACATCCGTTACAGAAATAACGGAGGGTACGAACTGAATGGAGC  |
| Nichols  | <i>tprJ/I</i> | loci | 4294 | GTACATCCCCCTCACCTACATCCGTTACAGAAATAACGGAGGGTACGAACTGAATGGAGC  |
| Sea 81-4 | <i>tprJ/I</i> | loci | 4348 | TGTGCCCCCTGGGACTATCAATATGCCAATTTTGGGGAAGGCGTGGTGCAGCTATCGCAT  |
| Nichols  | <i>tprJ/I</i> | loci | 4354 | TGTGCCCCCTGGGACTATCAATATGCCAATTTTGGGGAAGGCGTGGTGCAGCTATCGCAT  |
| Sea 81-4 | <i>tprJ/I</i> | loci | 4408 | CCCCCTCGGTTCCACGCCTGGCTTACACCGCATAACATCCGTGCTCGGCACAACCAATCG  |
| Nichols  | <i>tprJ/I</i> | loci | 4414 | CCCCCTCGGTTCCACGCCTGGCTTACACCGCATAACATCCGTGCTCGGCACAACCAATCG  |

Sea 81-4 *tprJ/I* loci 4468 CTTTAACGTTATTAACCCCGGTACACCCTGTTGAATGAACGAGCGCTCCAGTACCAGGT  
Nichols *tprJ/I* loci 4474 CTTTAACGTTATTAACCCCGGTACACCCTGTTGAATGAACGAGCGCTCCAGTACCAGGT

Sea 81-4 *tprJ/I* loci 4528 GGGACTGACGTTTCAGTCCCTTCGAGAAGGTGGAGCTCAGCGCCAGTGGGAACAGGGGGT  
Nichols *tprJ/I* loci 4534 GGGACTGACGTTTCAGTCCCTTCGAGAAGGTGGAGCTCAGCGCCAGTGGGAACAGGGGGT

Sea 81-4 *tprJ/I* loci 4588 GCTTGCTGACGCTCCTTACATGGGTATTGCCGAGAGTATGTGGTCTGAGCGTACTTTGG  
Nichols *tprJ/I* loci 4594 GCTTGCTGACGCTCCTTACATGGGTATTGCCGAGAGTATGTGGTCTGAGCGTACTTTGG

*tprI* stop (genome sequence)

\*\*\*

Sea 81-4 *tprJ/I* loci 4648 CACGTTTATCTGTGGGGTGAAGGTGGTTTGGTGAGGGGTGTCGTGTGGGCCAGAGAACG  
Nichols *tprJ/I* loci 4654 CACGTTTATCTGTGGGGTGAAGGTGGTTTGGTGAGGGGTGTCGTGTGGGCCAGAGAACG

Sea 81-4 *tprJ/I* loci 4708 GGTACGGTGGGGTGC CGCTTTTCCCGTGGGGCTGTGCGCGCTCAGTTTACAGGCGAG  
Nichols *tprJ/I* loci 4714 GGTACGGTGGGGTGC CGCTTTTCCCGTGGGGCTGTGCGCGCTCAGTTTACAGGCGAG

Sea 81-4 *tprJ/I* loci 4768 GGATTGCAGGGGTATGTGCGGGAAGCGTCTGGGTAAAGTGATGGTGCTCGGGTGTATGTT  
Nichols *tprJ/I* loci 4773 GGATTGCAGGGGTATGTGCGGGAAGCGTCTGGGTAAAGTGATGGTGCTCGGGTGTATGTT

Sea 81-4 *tprJ/I* loci 4828 GCCGGGTGTGGCGGCGCTGTTTCTCTCTCCCCAAGCTCGGGGTGTACGGGGACGCACG  
Nichols *tprJ/I* loci 4833 GCCGGGTGTGGCGGCGCTGTTTCTCTCTCCCCAAGCTCGGGGTGTACGGGGACGCACG

Sea 81-4 *tprJ/I* loci 4888 CGGCGGTTCTGACCTGTGGGCATCTGCATACAAGCTCCACAATGCCAGATACAGAGAA  
Nichols *tprJ/I* loci 4893 CGGCGGTTCTGACCTGTGGGCATCTGCATACAAGCTCCACAATGCCAGATACAGAGAA

Sea 81-4 *tprJ/I* loci 4948 CCAGGCGCCTCCGCGCTATGCGCCGAGACACCGTTGGTGGGGCTGGACGTGGCGTTCCG  
Nichols *tprJ/I* loci 4953 CCAGGCGCCTCCGCGCTATGCGCCGAGACACCGTTGGTGGGGCTGGACGTGGCGTTCCG

Sea 81-4 *tprJ/I* loci 5008 TCGGAAAAATGGCTTCCCTGCTCCAAGTACGGTGGACGCGGCACTCACGCGTTAATGTT  
Nichols *tprJ/I* loci 5013 TCGGAAAAATGGCTTCCCTGCTCCAAGTACGGTGGACGCGGCACTCACGCGTTAATGTT

Sea 81-4 *tprJ/I* loci 5068 CTGCGGCCGGTGTGGCCGGTTATTCGTTTCAGACCGGGGAAGGTAGTACGCATCTGTC  
Nichols *tprJ/I* loci 5073 CTGCGGCCGGTGTGGCCGGTTATTCGTTTCAGACCGGGGAAGGTAGTACGCATCTGTC

Sea 81-4 *tprJ/I* loci 5128 GGTAGCGGCGGGTTTTGAGTGCACCGCGCTCATCTACGATAGCCAGCACTTTCTTTCCGGT  
Nichols *tprJ/I* loci 5133 GGTAGCGGCGGGTTTTGAGTGCACCGCGCTCATCTACGATAGCCAGCACTTTCTTTCCGGT

Sea 81-4 *tprJ/I* loci 5188 TCTTGGGCAGGGCTTACT  
Nichols *tprJ/I* loci 5193 TCTTGGGCAGGGCTTACT

## B

|                             |     |                                                               |
|-----------------------------|-----|---------------------------------------------------------------|
| Sea 81-4 <i>tprG/F</i> loci | 1   | CCCTGCGTTTCCCATCTGCGGCTGTGCTCTTAGAGCAGCCGATGAGCAGCATGGCGCA    |
| Nichols <i>tprG/F</i> loci  | 1   | CCCTGCGTTTCCCATCTGCGGCTGTGCTCTTAGAGCAGCCGATGAGCAGCATGGCGCA    |
| Sea 81-4 <i>tprG/F</i> loci | 61  | AAAAACGCCCGCAAACCCCTTCGCGTACCCACTTCTCTCTCACAGAATCCTCCCCCTTT   |
| Nichols <i>tprG/F</i> loci  | 61  | AAAAACGCCCGCAAACGC---GCGTACCCACTTCTCTCTCACAGAATCCTCCCCCTTT    |
| Sea 81-4 <i>tprG/F</i> loci | 121 | ATCGACAAACATGCGCAAATAAGGGGTACAGTGTAAACCAAGGGGACAAGGAGGTGCA    |
| Nichols <i>tprG/F</i> loci  | 118 | ATCGACAAACATGCGCAAATAAGGGGTACAGTGTAAACCAAGGGGACAAGGAGGTGCA    |
| Sea 81-4 <i>tprG/F</i> loci | 181 | AGGAGTGGTGAGTTTTTTCGCTGTGTGCAGGTGGCAGGGTGAGGGGGCTACTAGACAGGGC |
| Nichols <i>tprG/F</i> loci  | 178 | AGGAGTGGTGAGTTTTTTCGCTGTGTGCAGGTGGCAGGGTGAGGGGGCTACTAGACAGGGC |
|                             |     | -----                                                         |
|                             |     | -10                                                           |
|                             |     | <i>tprG</i> start                                             |
|                             |     | (genome sequence)                                             |
|                             |     | ***                                                           |
| Sea 81-4 <i>tprG/F</i> loci | 241 | CGGGGGGGGGGTGAGGTAGCATGGGGTGCATGCGGTGGGGGAGTGTGCTGTGTGTGGTG   |
| Nichols <i>tprG/F</i> loci  | 238 | CGGGGGGGGGGTGAGGTAGCATGGGGTGCATGCGGTGGGGGAGTGTGCTGTGTGTGGTG   |
|                             |     | -----                                                         |
|                             |     | -35                                                           |
|                             |     | Predicted Sigma 70 consensus sequences                        |
| Sea81-4 <i>tprG/F</i> loci  | 301 | GTGGGGGTAGGAGCGAGCGGGGAGTGCTCGGACAGGAGTTTCCCCGAAGCTAACTGGC    |
| Nichols <i>tprG/F</i> loci  | 298 | GTGGGGGTAGGAGCGAGCGGGGAGTGCTCGGACAGGAGTTTCCCCGAAGCTAACTGGC    |
| Sea 81-4 <i>tprG/F</i> loci | 361 | TCTGCCACACTTGAGTGGGCATCAGCTATGGCAAGGGGTAGGCAGTCATGGCCAGGCC    |
| Nichols <i>tprG/F</i> loci  | 358 | TCTGCCACACTTGAGTGGGCATCAGCTATGGCAAGGGGTAGGCAGTCATGGCCAGGCC    |
| Sea 81-4 <i>tprG/F</i> loci | 421 | CCTGGTGCAGTTATGGGCACCGGTCCCTACAATCTGAAGCACGGGTTTCGTA CTACCAAC |
| Nichols <i>tprG/F</i> loci  | 418 | CCTGGTGCAGTTATGGGCACCGGTCCCTACAATCTGAAGCACGGGTTTCGTA CTACCAAC |
| Sea 81-4 <i>tprG/F</i> loci | 481 | ACGGTGGGAGTATCCTTTCCCTGGTTATGCGCACCACCCACACGCGCCGTGGGCAGCAC   |
| Nichols <i>tprG/F</i> loci  | 478 | ACGGTGGGAGTATCCTTTCCCTGGTTATGCGCACCACCCACACGCGCCGTGGGCAGCAC   |
| Sea 81-4 <i>tprG/F</i> loci | 541 | CCGGCACTGTATGCGGAGCTGAAGGTGGCGGACCTGCAGGCGGACCTGAGTCAGGGGAAG  |
| Nichols <i>tprG/F</i> loci  | 538 | CCGGCACTGTATGCGGAGCTGAAGGTGGCGGACCTGCAGGCGGACCTGAGTCAGGGGAAG  |
| Sea 81-4 <i>tprG/F</i> loci | 601 | GCAGGTTTTGCCGTTAAGCGCAAGGGGAAGGTAGAGGCGACACTACACTGTTATGGGGCC  |
| Nichols <i>tprG/F</i> loci  | 598 | GCAGGTTTTGCCGTTAAGCGCAAGGGGAAGGTAGAGGCGACACTACACTGTTATGGGGCC  |
| Sea 81-4 <i>tprG/F</i> loci | 661 | TACCTGACGATTGGGAAGAACCCACGTTTCTGACGAACTTTGCCCGGCTGTGGAAGCCG   |
| Nichols <i>tprG/F</i> loci  | 658 | TACCTGACGATTGGGAAGAACCCACGTTTCTGACGAACTTTGCCCGGCTGTGGAAGCCG   |
| Sea 81-4 <i>tprG/F</i> loci | 721 | TGGGTGACAGCGCAGTACCAGGAGGATGCGGTACAGTATGCGCCGGGTTTGGGGGTTTA   |
| Nichols <i>tprG/F</i> loci  | 718 | TGGGTGACAGCGCAGTACCAGGAGGATGCGGTACAGTATGCGCCGGGTTTGGGGGTTTA   |



|          |                    |      |                                                               |
|----------|--------------------|------|---------------------------------------------------------------|
| Sea 81-4 | <i>tprG/F</i> loci | 781  | GCGCGCAAGGTTGGGTATCGGGCACAGGACATTGGGGGCAGTGGGGTCAGCCTTGATGTG  |
| Nichols  | <i>tprG/F</i> loci | 778  | GCGCGCAAGGTTGGGTATCGGGCACAGGACATTGGGGGCAGTGGGGTCAGCCTTGATGTG  |
| Sea81-4  | <i>tprG/F</i> loci | 841  | GGGTTTCTCTCCTTTGCCTCTAACGGTGCCTGGGATAGTACTGACCCACGCACAGTAAG   |
| Nichols  | <i>tprG/F</i> loci | 838  | GGGTTTCTCTCCTTTGCCTCTAACGGTGCCTGGGATAGTACTGACCCACGCACAGTAAG   |
| Sea 81-4 | <i>tprG/F</i> loci | 901  | TATGGCTTTGGGGCAGACTTGAAGCTAATGTATGCGCGTGCAGGACACCCTCTGTGCAGC  |
| Nichols  | <i>tprG/F</i> loci | 898  | TATGGCTTTGGGGCAGACTTGAAGCTAATGTATGCGCGTGCAGGACACCCTCTGTGCAGC  |
| Sea 81-4 | <i>tprG/F</i> loci | 961  | GTAGAGCTTGCCAGCAATGTACGCTAGAAGACGGATACCTCATCGGTGCACAGAAGGAC   |
| Nichols  | <i>tprG/F</i> loci | 958  | GTAGAGCTTGCCAGCAATGTACGCTAGAAGACGGATACCTCATCGGTGCACAGAAGGAC   |
| Sea 81-4 | <i>tprG/F</i> loci | 1021 | GCAAACAATCAGAACAAGGATAAACTGCTGTGGAATGTAGGGGGCCGACTCACCCCTCGAA |
| Nichols  | <i>tprG/F</i> loci | 1018 | GCAAACAATCAGAACAAGGATAAACTGCTGTGGAATGTAGGGGGCCGACTCACCCCTCGAA |
| Sea 81-4 | <i>tprG/F</i> loci | 1081 | CCAGGCGCCGGCTTCCGCTTCTCCTTCGCCCTCGACGCCGTAACCAACACCAGAGTGCA   |
| Nichols  | <i>tprG/F</i> loci | 1078 | CCAGGCGCCGGCTTCCGCTTCTCCTTCGCCCTCGACGCCGTAACCAACACCAGAGTGCA   |
| Sea 81-4 | <i>tprG/F</i> loci | 1141 | CAGGACTTTCAAATCGCACACAGAGGGCGCAGAGTGAATCACCGCCCTCTCAAATAAC    |
| Nichols  | <i>tprG/F</i> loci | 1138 | CAGGACTTTCAAATCGCACACAGAGGGCGCAGAGTGAATCACCGCCCTCTCAAATAAC    |
| Sea 81-4 | <i>tprG/F</i> loci | 1201 | CTCTTCCAGGGAGAAAGTCAAAAACAGGAAGCCTGGCTGGACGAATATGCAAAGAAGGTG  |
| Nichols  | <i>tprG/F</i> loci | 1198 | CTCTTCCAGGGAGAAAGTCAAAAACAGGAAGCCTGGCTGGACGAATATGCAAAGAAGGTG  |
| Sea 81-4 | <i>tprG/F</i> loci | 1261 | CTTGATGCCGTAACGGCAGCACCCGAAACCGCCCTTCAGTCGAGGGGAAACGCGTACATA  |
| Nichols  | <i>tprG/F</i> loci | 1258 | CTTGATGCCGTAACGGCAGCACCCGAAACCGCCCTTCAGTCGAGGGGAAACGCGTACATA  |
| Sea 81-4 | <i>tprG/F</i> loci | 1321 | ACGGCAGTGTCAAACGTAAAAGTCACCCCTCCGGTAGCTGCCACGCTTTTGACGAACCTG  |
| Nichols  | <i>tprG/F</i> loci | 1318 | ACGGCAGTGTCAAACGTAAAAGTCACCCCTCCGGTAGCTGCCACGCTTTTGACGAACCTG  |
| Sea 81-4 | <i>tprG/F</i> loci | 1381 | AAGGTGTTCAATTACCGACCTCCTACACCGTCACCGCTTCCCGCGCTTCTGCATTTTCC   |
| Nichols  | <i>tprG/F</i> loci | 1378 | AAGGTGTTCAATTACCGACCTCCTACACCGTCACCGCTTCCCGCGCTTCTGCATTTTCC   |
| Sea 81-4 | <i>tprG/F</i> loci | 1441 | CTGATGGGGCAGGTTTTTGCTGCAGTACGATGCGGAGCAGGTGGTGAAGGGGTTTGAGCAG |
| Nichols  | <i>tprG/F</i> loci | 1438 | CTGATGGGGCAGGTTTTTGCTGCAGTACGATGCGGAGCAGGTGGTGAAGGGGTTTGAGCAG |
| Sea 81-4 | <i>tprG/F</i> loci | 1501 | GTACAGACGCAAAATCGTTGCTGAAATTAACCAGAAAGTCAAGCGGCTGTGGCTCAGAGC  |
| Nichols  | <i>tprG/F</i> loci | 1498 | GTACAGACGCAAAATCGTTGCTGAAATTAACCAGAAAGTCAAGCGGCTGTGGCTCAGAGC  |
| Sea 81-4 | <i>tprG/F</i> loci | 1561 | AAGGCTGCAGCACAGGCATTATCAACGGTCTTACCAAGGCAATAGAAGACGTGGCTGAT   |
| Nichols  | <i>tprG/F</i> loci | 1558 | AAGGCTGCAGCACAGGCATTATCAACGGTCTTACCAAGGCAATAGAAGACGTGGCTGAT   |
| Sea 81-4 | <i>tprG/F</i> loci | 1621 | GCGTTGCTTGACCCGCATAAGGGAAATCCGATGAGCCTTTCAACCTTCCGGATCAACAA   |
| Nichols  | <i>tprG/F</i> loci | 1618 | GCGTTGCTTGACCCGCATAAGGGAAATCCGATGAGCCTTTCAACCTTCCGGATCAACAA   |
| Sea 81-4 | <i>tprG/F</i> loci | 1681 | AAATTAAGGACGATTCGCCGATCTTATTCCAAGCTTACGGCTGAGGCTACAAAG        |
| Nichols  | <i>tprG/F</i> loci | 1678 | AAATTAAGGACGATTCGCCGATCTTATTCCAAGCTTACGGCTGAGGCTACAAAG        |





Sea 81-4 *tprG/F* loci 3481 GGGGAGCTCACGGGAGAAGTTTGACAGCGCGTTCGATGCCCTCAGGGTGGAGCAATACCG  
Nichols *tprG/F* loci 3466 GGGGAGCTCACGGGAGAAGTTTGACAGCGCGTTCGATGCCCTCAGGGTGGAGCAATACCG

Sea 81-4 *tprG/F* loci 3541 TGTAAAGGATAAGTATCTTGAATTTTTGCTGGGACAGATGGCGGAGTCCTCGATTCTCGA  
Nichols *tprG/F* loci 3526 TGTAAAGGATAAGTATCTTGAATTTTTGCTGGGACAGATGGCGGAGTCCTCGATTCTCGA

Sea 81-4 *tprG/F* loci 3601 CCGGGTGGGGCTTGCCCTCACGCTGCAGGACGGTACGCTCGTCTCTACGCTGACGAAGGT  
Nichols *tprG/F* loci 3586 CCGGGTGGGGCTTGCCCTCACGCTGCAGGACGGTACGCTCGTCTCTACGCTGACGAAGGT

tprF stop  
\*\*\*

Sea 81-4 *tprG/F* loci 3661 TGCCACTGATAGTGGAGCTCAGCGCCCAGTGGGAACAGGGGTGCTTGTGACGCTCCTT  
Nichols *tprG/F* loci 3646 TGCCACTGATAGTGGAGCTCAGCGCCCAGTGGGAACAGGGGTGCTTGTGACGCTCCTT

Sea 81-4 *tprG/F* loci 3721 ACATGGGTATTGCCGAGAGTATGTGGTCTGAGCGTTACTTTGGCACGTTTATCTGTGGGG  
Nichols *tprG/F* loci 3706 ACATGGGTATTGCCGAGAGTATGTGGTCTGAGCGTTACTTTGGCACGTTTATCTGTGGGG

Sea 81-4 *tprG/F* loci 3781 TGAAGGTGGTTTGGTGAGGGGTGTGCGTGTGGGCCAGAGAACGGGTACGGTGGGGGTGCG  
Nichols *tprG/F* loci 3766 TGAAGGTGGTTTGGTGAGGGGTGTGCGTGTGGGCCAGAGAACGGGTACGGTGGGGGTGCG

Sea 81-4 *tprG/F* loci 3841 CGTTTTCCCGTGGGGCTGTGCGCGCTCAGTTTACAGGCAGGGATTGCAGGGGTATGTG  
Nichols *tprG/F* loci 3826 CGTTTTCCCGTGGGGCTGTGCGCGCTCAGTTTACAGGCAGGGATTGCAGGGGTATGTG

Sea 81-4 *tprG/F* loci 3901 CGGGAAGCGTCTGGGTAAAGTGATGGTGCTCGGGTGTATGTTGCCGGGTGTGGCGGCGCG  
Nichols *tprG/F* loci 3886 CGGGAAGCGTCTGGGTAAAGTGATGGTGCTCGGGTGTATGTTGCCGGGTGTGGCGGCGCG

Sea 81-4 *tprG/F* loci 3961 TGTTTCTCTCTCCCCAAGCTCGGGGTGTACGGGGACGCACGGCGGTTCTGACCTGTG  
Nichols *tprG/F* loci 3946 TGTTTCTCTCTCCCCAAGCTCGGGGTGTACGGGGACGCACGGCGGTTCTGACCTGTG

Sea 81-4 *tprG/F* loci 4021 GGGCATCTGCATAACAAGCTCCCACAATGCCAGATACAGAGAACCAGGCGCTCCGCGCTA  
Nichols *tprG/F* loci 4006 GGGCATCTGCATAACAAGCTCCCACAATGCCAGATACAGAGAACCAGGCGCTCCGCGCTA

Sea 81-4 *tprG/F* loci 4081 TGCGCCGGAGACACCGTTGGTGGGGCTGGACGTGGCGTTCCGTGCGGAAAATGGCTTCCT  
Nichols *tprG/F* loci 4066 TGCGCCGGAGACACCGTTGGTGGGGCTGGACGTGGCGTTCCGTGCGGAAAATGGCTTCCT

Sea 81-4 *tprG/F* loci 4141 GCTCCAAGTACGGTGGACGCGGCACTCACGCGTTTAAATGTTCTGCGGCGGTTGTTGGC  
Nichols *tprG/F* loci 4126 GCTCCAAGTACGGTGGACGCGGCACTCACGCGTTTAAATGTTCTGCGGCGGTTGTTGGC

Sea 81-4 *tprG/F* loci 4201 CGGTTATTCGTTTCAGACCGGGGAAGGTAGTAC  
Nichols *tprG/F* loci 4186 CGGTTATTCGTTTCAGACCGGGGAAGGTAGTAC

===== : Sea81-4 strain *tprG/F* intergenic spacer  
>>>>>>> : Nichols strain *tprG/F* intergenic spacer

**FIGURE 2S**

|                      |     |                                                               |     |                                                               |
|----------------------|-----|---------------------------------------------------------------|-----|---------------------------------------------------------------|
| <b>Sea 81-4 TprI</b> | 1   | MGRQVMQAGVLAGMVCAASGYAGVLT                                    | 1   | MGRQVMQAGVLAGMVCAASGYAGVLT                                    |
| <b>Nichols TprI</b>  | 1   | MGRQVMQAGVLAGMVCAASGYAGVLT                                    | 1   | MGRQVMQAGVLAGMVCAASGYAGVLT                                    |
| <b>Sea 81-4 TprI</b> | 61  | GLTISLPLVSKHHTTRRGEARSGVWAQLQLKDLAVELASSKSSTALSFTKPTASFOATLH  | 61  | GLTISLPLVSKHHTTRRGEARSGVWAQLQLKDLAVELASSKSSTALSFTKPTASFOATLH  |
| <b>Nichols TprI</b>  | 61  | GLTISLPLVSKHHTTRRGEARSGVWAQLQLKDLAVELASSKSSTALSFTKPTASFOATLH  | 61  | GLTISLPLVSKHHTTRRGEARSGVWAQLQLKDLAVELASSKSSTALSFTKPTASFOATLH  |
| <b>Sea 81-4 TprI</b> | 121 | CYGAYLTVGTSPSCVVFNAQLWKPFVTRAYSEKDTRYAPGFSGSGAKLGYQAHNVGNSGV  | 121 | CYGAYLTVGTSPSCVVFNAQLWKPFVTRAYSEKDTRYAPGFSGSGAKLGYQAHNVGNSGV  |
| <b>Nichols TprI</b>  | 121 | CYGAYLTVGTSPSCVVFNAQLWKPFVTRAYSEKDTRYAPGFSGSGAKLGYQAHNVGNSGV  | 121 | CYGAYLTVGTSPSCVVFNAQLWKPFVTRAYSEKDTRYAPGFSGSGAKLGYQAHNVGNSGV  |
| <b>Sea 81-4 TprI</b> | 181 | DVDIGFLSFLSNGAWDSTDTTHSKYGFGD                                 | 181 | DATLSYGVDQRLLTLELAGNATLD                                      |
| <b>Nichols TprI</b>  | 181 | DVDIGFLSFLSNGAWDSTDTTHSKYGFGD                                 | 181 | DATLSYGVDQRLLTLELAGNATLE                                      |
| <b>Sea 81-4 TprI</b> | 241 | TEDSK                                                         | 241 | NENKTALLWGVGGRLTLEPGAGFRFSFALDAGNQ                            |
| <b>Nichols TprI</b>  | 241 | TEDST                                                         | 241 | NENKTALLWGVGGRLTLEPGAGFRFSFALDAGNQ                            |
| <b>Sea 81-4 TprI</b> | 301 | HSAFDALRVEQYRVKDKYLEFLLGQMAESSILERVGLALTLQDGTLVSTLT           | 301 | HSAFDALRVEQYRVKDKYLEFLLGQMAESSILERVGLALTLQDGTLVSTLT           |
| <b>Nichols TprI</b>  | 301 | HSAFDALRVEQYRVKDKYLEFLLGQMAESSILERVGLALTLQDGTLVSTLT           | 301 | HSAFDALRVEQYRVKDKYLEFLLGQMAESSILERVGLALTLQDGTLVSTLT           |
| <b>Sea 81-4 TprI</b> | 361 | FIQMALVKLLPQRAQAEQRLQEIIVAPSQSDIVLIMLLTWLERARLDRFNADALLTAQWTY | 361 | FIQMALVKLLPQRAQAEQRLQEIIVAPSQSDIVLIMLLTWLERARLDRFNADALLTAQWTY |
| <b>Nichols TprI</b>  | 361 | FIQMALVKLLPQRAQAEQRLQEIIVAPSQSDIVLIMLLTWLERARLDRFNADALLTAQWTY | 361 | FIQMALVKLLPQRAQAEQRLQEIIVAPSQSDIVLIMLLTWLERARLDRFNADALLTAQWTY |
| <b>Sea 81-4 TprI</b> | 421 | VSAGLYGATAGTNVFGKRVLPALRSWHFDFAGFLKLET                        | 421 | VSAGLYGATAGTNVFGKRVLPALRSWHFDFAGFLKLET                        |
| <b>Nichols TprI</b>  | 421 | VSAGLYGATAGTNVFGKRVLPALRSWHFDFAGFLKLET                        | 421 | VSAGLYGATAGTNVFGKRVLPALRSWHFDFAGFLKLET                        |
| <b>Sea 81-4 TprI</b> | 481 | IPLTYIRYRNNGGYELNGAVPPGTINM                                   | 481 | IPLTYIRYRNNGGYELNGAVPPGTINM                                   |
| <b>Nichols TprI</b>  | 481 | IPLTYIRYRNNGGYELNGAVPPGTINM                                   | 481 | IPLTYIRYRNNGGYELNGAVPPGTINM                                   |
| <b>Sea 81-4 TprI</b> | 541 | NVINPAYTLLNERALQYQVGLTFS                                      | 541 | NVINPAYTLLNERALQYQVGLTFS                                      |
| <b>Nichols TprI</b>  | 541 | NVINPAYTLLNERALQYQVGLTFS                                      | 541 | NVINPAYTLLNERALQYQVGLTFS                                      |
| <b>Sea 81-4 TprI</b> | 601 | FICGVKVVW                                                     | 601 | FICGVKVVW                                                     |
| <b>Nichols TprI</b>  | 601 | FICGVKVVW                                                     | 601 | FICGVKVVW                                                     |

FIGURE 3S

|               |     |                                                                  |                                  |
|---------------|-----|------------------------------------------------------------------|----------------------------------|
| Sea 81-4 TprG | 1   | MGCMRWGSVLCVVVGVGASGGVLGQEEF                                     | PKLTGSATLEWGISYGKGVGSHGQAPGAVMGT |
| Nichols TprG  | 1   | MGCMRWGSVLCVVVGVGASGGVLGQEEF                                     | PKLTGSATLEWGISYGKGVGSHGQAPGAVMGT |
| Sea 81-4 TprG | 61  | GPYNLKHGFRTTNTVGVSFPLVMRTHTRRGQHPALYAELKVADLQADLSQGKAGFAVKR      |                                  |
| Nichols TprG  | 61  | GPYNLKHGFRTTNTVGVSFPLVMRTHTRRGQHPALYAELKVADLQADLSQGKAGFAVKR      |                                  |
| Sea 81-4 TprG | 121 | KGKVEATLHCYGAYLTI GKNPTFLTNFARLWKPWVTAQYQEDAVQYAPGFGGLGGKVGYR    |                                  |
| Nichols TprG  | 121 | KGKVEATLHCYGAYLTI GKNPTFLTNFARLWKPWVTAQYQEDAVQYAPGFGGLGGKVGYR    |                                  |
| Sea 81-4 TprG | 181 | AQDIGSGVSLDVGF LSFASNGAWDSTDP THSKYGF GADLKL MYARAGHP LCTVELASNV |                                  |
| Nichols TprG  | 181 | AQDIGSGVSLDVGF LSFASNGAWDSTDP THSKYGF GADLKL MYARAGHP LCTVELASNV |                                  |
| Sea 81-4 TprG | 241 | TLEDGYLIGAQKDANNQNKDKLLWNVGGRLTLEPGAGFRFSFALDAGNQHQSAQDFQNR      |                                  |
| Nichols TprG  | 241 | TLEDGYLIGAQKDANNQNKDKLLWNVGGRLTLEPGAGFRFSFALDAGNQHQSAQDFQNR      |                                  |
| Sea 81-4 TprG | 301 | QRAQSELTALSNNLFQGESQKQEAWLDEYAKKVLDAVTAATETALQSRGNAYITAVSNVK     |                                  |
| Nichols TprG  | 301 | QRAQSELTALSNNLFQGESQKQEAWLDEYAKKVLDAVTAATETALQSRGNAYITAVSNVK     |                                  |
| Sea 81-4 TprG | 361 | VTPPVAATLLTNLKVFI TDPPTPSPLPALPAFSLMGQVLLQYDAEQVVKGF EQVQTQIVA   |                                  |
| Nichols TprG  | 361 | VTPPVAATLLTNLKVFI TDPPTPSPLPALPAFSLMGQVLLQYDAEQVVKGF EQVQTQIVA   |                                  |
| Sea 81-4 TprG | 420 | EINQKVQAAVAQSKAAAQAFINGLTKAIEDVADALLAPHKGNP                      | MSLFNLPDQQKLLKDD                 |
| Nichols TprG  | 420 | EINQKVQAAVAQSKAAAQAFINGLTKAIEDVADALLAPHKGNP                      | MSLFNLPDQQKLLKDD                 |
| Sea 81-4 TprG | 479 | LADLIPKLTAEATKFFTEGQTFVTEEVKKKTDALDAGQQIRQAIQNLRASAWRAFLMGVS     |                                  |
| Nichols TprG  | 479 | LADLIPKLTAEATKFFTEGQTFVTEEVKKKTDALDAGQQIRQAIQNLRASAWRAFLMGVS     |                                  |
| Sea 81-4 TprG | 539 | AVCLYLDTYNVAFDALFTAQWKWLSSGIYV                                   | VATAPANVFGTRVLDNTIASCDFAGFLKLE   |
| Nichols TprG  | 539 | AVCLYLDTYNVAFDALFTAQWKWLSSGIYV                                   | VATAPANVFGTRVLDNTIASCDFAGFLKLE   |
|               |     |                                                                  | frameshift                       |
|               |     |                                                                  | *                                |
| Sea 81-4 TprG | 599 | TKSGDPYTHLLTGLDAGVETRVYIPLTHDAIQK                                | -----                            |
| Nichols TprG  | 599 | TKSGDPYTHLLTGLDAGVETRVYIPLTY                                     | ALYKNNGGTAVRGIQEKEYIRPPVVGKAWCS  |
| Sea 81-4 TprG |     | -----                                                            |                                  |
| Nichols TprG  | 658 | YRIPVQDYGWVKPSVTVHASTNRAHLNAPAAGGAVGATYLTKEYCAQLRAGISASLIEKT     |                                  |
| Sea 81-4 TprG |     | -----                                                            |                                  |
| Nichols TprG  | 718 | VFSLDWEQGM LSDVPYLLVSECLTQGIGRIVCGVTL SW                         |                                  |

**FIGURE 4S**

|                      |     |                              |                             |                    |    |
|----------------------|-----|------------------------------|-----------------------------|--------------------|----|
| <b>Sea 81-4 TprF</b> | 1   | VGRQVMQAGVLAGMVCAASGYAGVLT   | PQVSGTAQLQWGI               | AFQKNPRTGPGKHTHGFR | TN |
| <b>Nichols TprF</b>  | 1   | VGRQVMQAGVLAGMVCAASGYAGVLT   | PQVSGTAQLQWGI               | AFQKNPRTGPGKHTHGFR | TN |
| <b>Sea 81-4 TprF</b> | 61  | NLTISLPLVSKHHTTRRGEARSGVWAQ  | LKDLAVELASSKSSTALSFTKPTAS   | FQATLH             |    |
| <b>Nichols TprF</b>  | 61  | NLTISLPLVSKHHTTRRGEARSGVWAQ  | LKDLAVELASSKSSTALSFTKPTAS   | FQATLH             |    |
| <b>Sea 81-4 TprF</b> | 121 | CYGAYLTVGTSPSCVVFNAQLWKPFV   | TRAYSEKDTRYAPGFP            | GSGAKLGYQAHNVGNSGV |    |
| <b>Nichols TprF</b>  | 121 | CYGAYLTVGTSPSCVVFNAQLWKPFV   | TRAYSEKDTRYAPGFS            | GSGAKLGYQAHNVGNSGV |    |
| <b>Sea 81-4 TprF</b> | 181 | DVDIGFLSFLSNGAWDSTDTTHSKYGF  | GADATLSYGVDRQRLLTLELAGNATLE | QHRYK              |    |
| <b>Nichols TprF</b>  | 181 | DVDIGFLSFLSNGAWDSTDTTHSKYGF  | GADATLSYGVDRQRLLTLELAGNATLE | QHRYK              |    |
| <b>Sea 81-4 TprF</b> | 241 | TEDSTNENKTALLWGVGRLTLEPGAGFR | FSFALDAGNQHQDPADAGNRLLATGSS | REKF               |    |
| <b>Nichols TprF</b>  | 241 | TEDSTNENKTALLWGVGRLTLEPGAGFR | FSFALDAGNQHQDPADAGNRLLATGSS | REKF               |    |
| <b>Sea 81-4 TprF</b> | 301 | DSAFDALRVEQYRVKDKYLEFLLGQMA  | ESSILERVGLALTLQDGT          | LVSTLTKVATDSGAQ    |    |
| <b>Nichols TprF</b>  | 301 | DSAFDALRVEQYRVKDKYLEFLLGQMA  | ESSILERVGLALTLQDGT          | LVSTLTKVATDSGAQ    |    |
| <b>Sea 81-4 TprF</b> | 361 | RPVGTGGAC                    |                             |                    |    |
| <b>Nichols TprF</b>  | 361 | RPVGTGGAC                    |                             |                    |    |
